# Supplementary material
Source: PubMed Central journal article supplement (PMC4506233)

## SUPPLEMENTAL DIGITAL CONTENT 2

**Figure.** Representative single-isocenter radiosurgery plans using volumetric modulated arc radiosurgery (VMAR) and intensity modulated radiosurgery (IMRS). Axial view (**top**) of VMAR plan for a patient with three intracranial metastases treated to a prescription dose of 20 Gy using a single arc. Axial view (**bottom**) of IMRS plan for a patient with three intracranial metastases treated to a prescription dose of 20 Gy using nine noncoplanar beams.

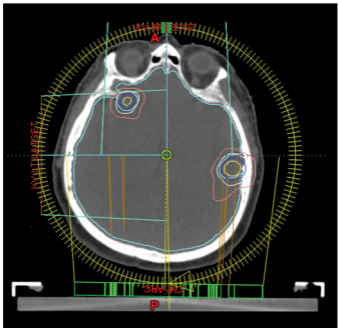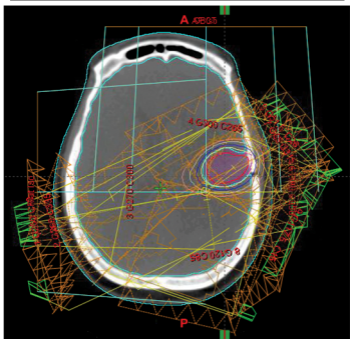

Supplement: NIHMS672409-supplement-Supplemental_Content_2.pdf [file NIHMS672409-supplement-Supplemental_Content_2.pdf]
